# Supplementary material for: Development of a Multi-Institutional Prediction Model for Three-Year Survival Status in Patients with Uterine Leiomyosarcoma (AGOG11-022/QCGC1302 Study)
Source: MDPI journal article supplement (doi:10.3390/cancers13102378), 2021-05-14
Supplement: s1 [file s1]

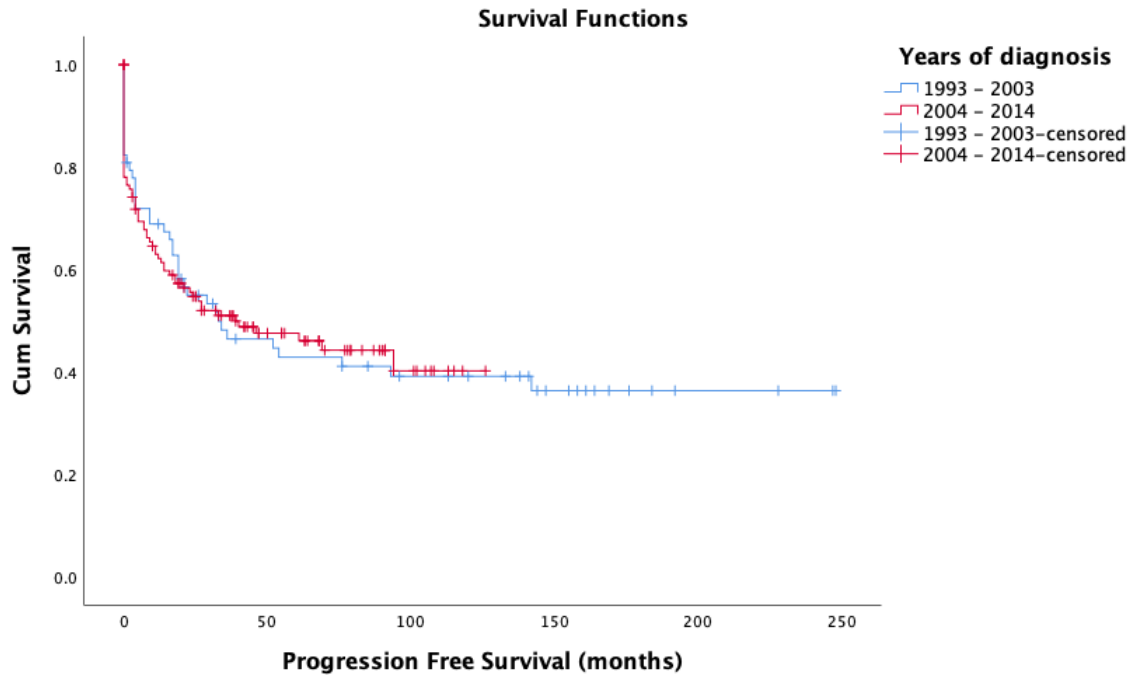

a. Progression-free survival of 201 patients stratified by the years of diagnosis

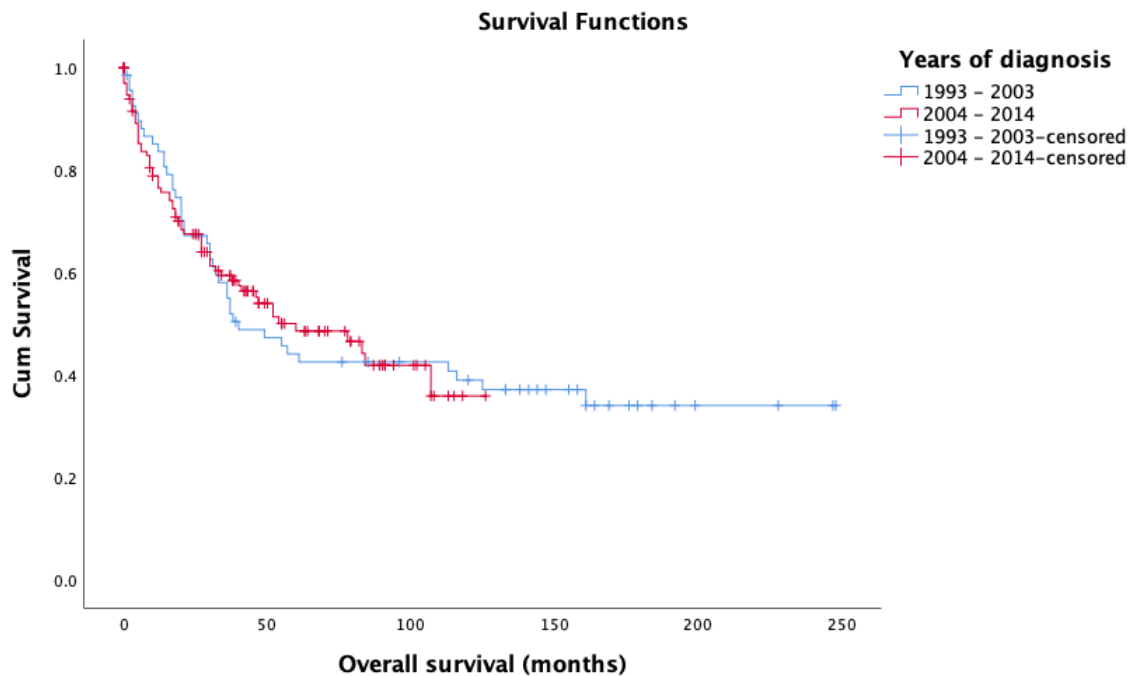

b. Overall survival of 201 patients stratified by the years of diagnosis

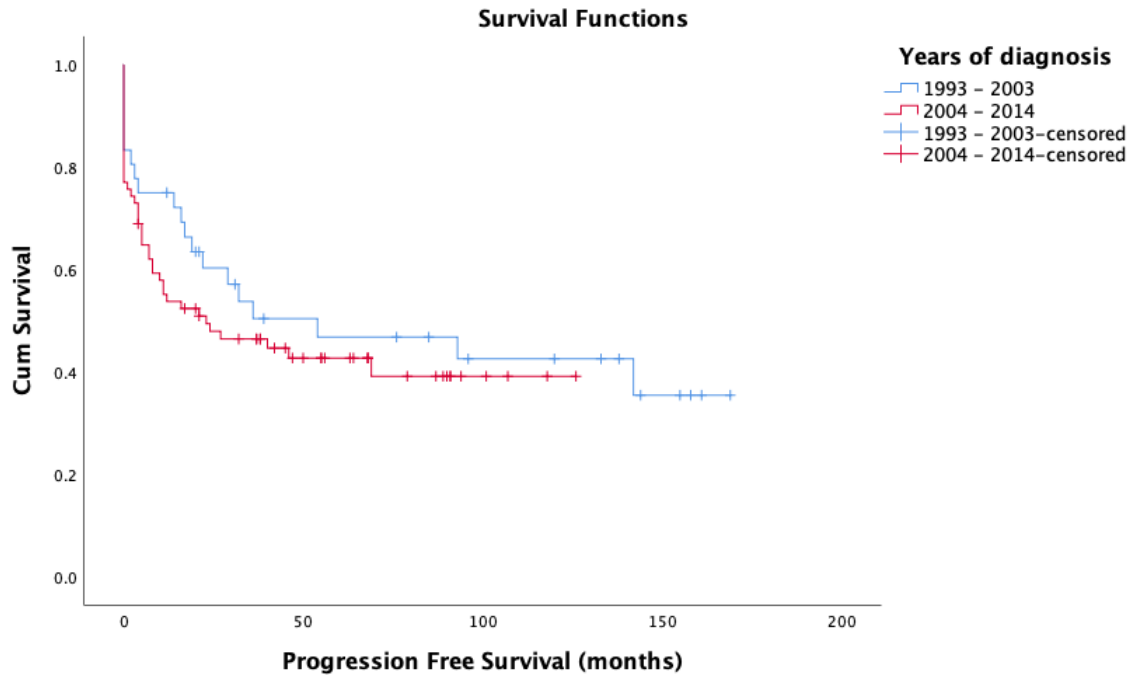

c. Progression-free survival of 110 patients stratified by the years of diagnosis

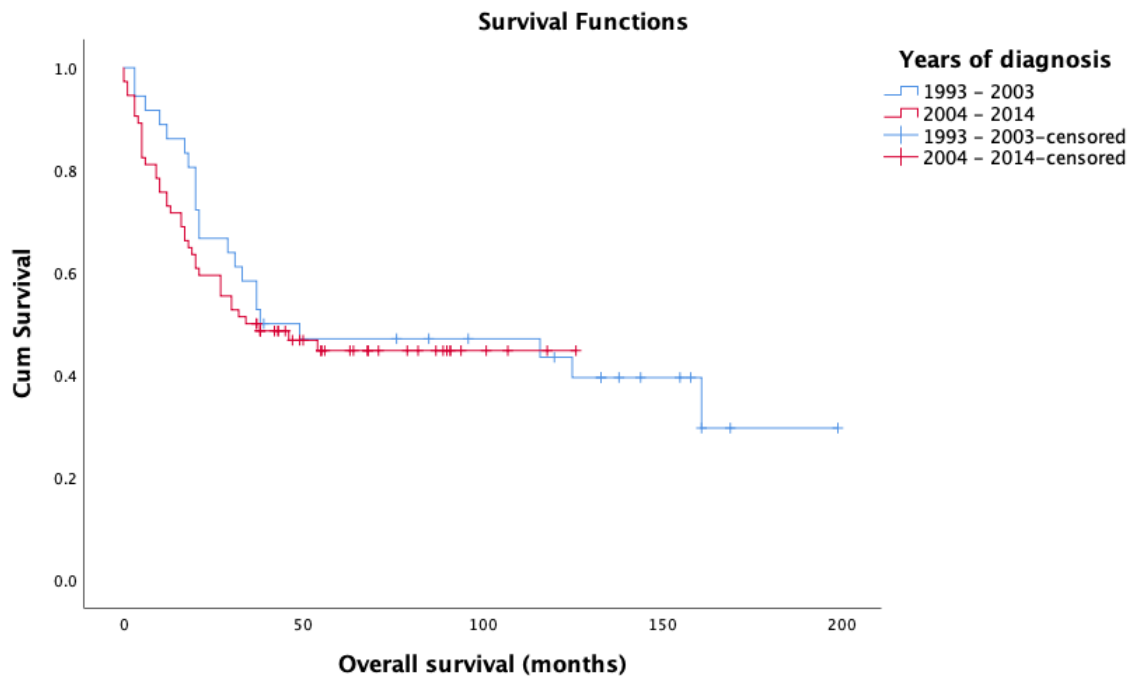

d. Overall survival of 110 patients stratified by the years of diagnosis

**Figure S2** Median progression-free survival and overall survival of the original 201 cohort and the 110 patients with complete information on the nine parameters, stratified according to the years of diagnosis
