# Supplementary material for: Development of a Multi-Institutional Prediction Model for Three-Year Survival Status in Patients with Uterine Leiomyosarcoma (AGOG11-022/QCGC1302 Study)
Source: MDPI journal article supplement (doi:10.3390/cancers13102378), 2021-05-14
Supplement: s1 [file s1]

|                                | <b>1993 – 2003</b> | <b>2004 – 2014</b> | <b>P value</b> |
|--------------------------------|--------------------|--------------------|----------------|
| <b>201 patients</b>            | 69                 | 132                |                |
| Median PFS (months)            | 33.0 (1.37 – 64.6) | 39.0 (2.97 – 75.0) | 0.970          |
| Median OS (months)             | 40.0 (19.2 – 60.8) | 60.0 (27.3 – 92.7) | 0.986          |
| Number of survival at 3rd year | 38 / 66 (57.6%)    | 63 / 113 (55.8%)   | 0.812          |
| <b>110 patients</b>            | 36                 | 74                 |                |
| Median PFS (months)            | 54.0 (0 – 129.5)   | 23.0 (0 – 54.8)    | 0.410          |
| Median OS (months)             | 38.0 (0 – 129.0)   | 34.0 (5.2 – 62.8)  | 0.576          |
| Number of survival at 3rd year | 21 / 36 (38.3%)    | 37 / 74 (50.0%)    | 0.411          |

**Table S2** Survival data of the original 201 cohort and the 110 patients with complete information on the nine parameters, stratified according to the years of diagnosis
