# Supplementary material for: Development of a Multi-Institutional Prediction Model for Three-Year Survival Status in Patients with Uterine Leiomyosarcoma (AGOG11-022/QCGC1302 Study)
Source: Cancers (Basel). 2021 May 14;13(10):2378. doi: 10.3390/cancers13102378 (PMC8155866; doi:10.3390/cancers13102378)
Supplement: Supplementary file 1 [file cancers-13-02378-s001.zip]

Archive with 4 entries (4 files):
- Figure S1_Supplementary material for R execution.pdf
- Figure S2_Survival curves of the patients stratified by the years of diagnosis.pdf
- Table S1_Database for buidling the prediction model.xlsx
- Table S2_Survival data of the patients stratified by the years of diagnosis .pdf
