# Supplementary material for: Development of a Multi-Institutional Prediction Model for Three-Year Survival Status in Patients with Uterine Leiomyosarcoma (AGOG11-022/QCGC1302 Study)
Source: Cancers (Basel). 2021 May 14;13(10):2378. doi: 10.3390/cancers13102378 (PMC8155866; doi:10.3390/cancers13102378)
Supplement: Supplementary file 1 [file cancers-13-02378-s001.zip › Table S1_Database for buidling the prediction model.xlsx]

## Sheet: database for building pred mode
Patient Recode	Age	log_tum_dia	log_MF	Cervix	Parametrium	LymphNode	Distant_exceptLN	MF_VascularInvasion	MF_Circumscription	ThreeYearSurvival	OS	Dead
uLMS1	47	1		0	0	0	0			0	91	0
uLMS2	51	0.95		0	0	0	0			0	52	1
uLMS3	47	1.26	1	0	0	0	0	0	1	0	42	0
uLMS4	41	1.22	1.63	0	0	0	0	0	0	1	16	1
uLMS5	43	0.81	1.68	0	0	0	0	0	1	0	47	0
uLMS6	40	0.74	1.18	0	0	0	0	0	1	0	55	0
uLMS7	43	0.85	1.41	0	0	0	0	0	0	1	20	1
uLMS8	50	0.93	1.72	0	0	0	0	0	0	1	31	1
uLMS9	44	0.95	1.11	0	0	0	0	0	1	1	21	1
uLMS10	65	1.04	1.46	0	0	0	0	0	0	1	21	1
uLMS11	46	1.28		0	0	0	0	1	0		28	0
uLMS12	30	0.38	1	0	0	0	0	0	0	0	79	0
uLMS13	49	0.48		0	0	0	0	0	0	0	47	0
uLMS14	47	1.04	0	0	0	0	0	0	1		0	0
uLMS15	45	1.04	0.6	0	0	0	0	0	1	0	55	0
uLMS16	60	0.98	1.28	0	0	0	0	0	0	0	85	0
uLMS17	38	0.78	0	0	0	0	0	0	1	0	169	0
uLMS18	37	0.7	0.7	0	0	0	0	0	1	0	63	0
uLMS19	49	1.57	1	0	0	0	0	0	0	1	12	1
uLMS20	54	0.78	0.7	0	0	0	0	0	1	0	96	0
uLMS21	49	0.9	0.85	0	0	0	0	0	0	0	133	0
uLMS22	48	0.78	0.85	0	0		0	0	1	0	105	0
uLMS23	81	0.98	0.7	0	0		0	0	0	0	83	1
uLMS24	54	0.4	0.78	0	0	0	0	0	1		0	0
uLMS25	49	1.11	1.32	0	0	0	0	0	0	0	38	0
uLMS26	39	0.7	1.52	0	0	0	0	1	0	1	20	1
uLMS27	44	0.78		0	1	0	0	0	1	0	78	1
uLMS28	42	1.15	1.04	0	0	0	0	0	1	1	32	1
uLMS29	45	0.9	0	0	0	0	0	0	1	0	87	0
uLMS30	45	0.3	1.08	0	0	0	0	0	0	0	89	0
uLMS31	39	1.11		0	0	0	0	0	1	0	77	0
uLMS32	58	0.99	1.46	0	0	0	0	0	0	1	17	1
uLMS33	49	0.8	1.93	0	0	0	0	0	0	0	68	0
uLMS34	61	1.04	0.7	0	0	0	0	0	1	0	37	0
uLMS35	52	0.85	1.04	0	0	0	0	0	0		33	0
uLMS36	44	0.92	0.7	0	0	0	0	0			24	0
uLMS37	39	0.48	1.26	1	0	0	0	0	0		19	0
uLMS38	51	1.02	1.15	0	0	0	1	0	0	1	4	1
uLMS39	47	0.89	1.68	0	0	0	0	0	0		25	0
uLMS40	56	0.85	1.04	0	0	0	0		0	1	12	1
uLMS41	40	1.28	1.08	0	0	0	0	0	1	0	50	0
uLMS42	47	1.04	0.9	0	0	0	0	0		0	45	0
uLMS43	34	0.54	1	0	0	0	0	0	0	0	55	0
uLMS44	64	0.95	1.18	0	0	0	0	1	1	0	64	0
uLMS45	53	1.04	1.46	0	0	0	0	1	1	1	19	1
uLMS46	43	0.3	1.36	0	0	0	0	1	0	0	101	0
uLMS47	37	1.23	1.88	1	0	0	0	0		0	55	1
uLMS48	46	0.7	1.04	0	0	0	0	0	0	0	161	1
uLMS49	50	0.65	1.59	0	0	0	0	1	1	0	76	0
uLMS50	50	0.6	1.68	0	0	0	0	1	0	0	116	1
uLMS51	51	1.08	1.41	0	1	0	0	1	0	1	20	1
uLMS52	65	0.7	1.11	0	0	0	0	0	0	1	21	1
uLMS53	74	1.3		0	0	0	1			1	2	1
uLMS54	58	1	0.6	0	0	0	0	0	1	0	107	0
uLMS55	38	1.04	0.6	0	0	0	0	0	1	0	56	0
uLMS56	47	0.78	1.34	0	0	0	0	1	0	0	91	0
uLMS57	44	1	0.78	0	0	0	0	0	1	0	71	0
uLMS58	77	1.38	1	0	1	0	0	0	0	1	3	1
uLMS59	43	1.04	1.04	0	1	0	0	0			27	0
uLMS60	58	1.4	1.45	0	1	0	1	0	1	0	125	1
uLMS61	48	1.11	1.81	0	0	0	0	0	0	1	29	1
uLMS62	71	0.9	1.32	0	0	0	0	0	1	0	49	1
uLMS63	42	0.65	1.43	0	0	0	0	1	1	1	18	1
uLMS64	62	1.06	0.95	0	0	0	0	0	0	0	54	1
uLMS65	79	0.81	1.26	0	0	0	0	1	0	1	17	1
uLMS66	48	0.93	1.63	0	0	0	0	0	1	0	90	0
uLMS67	51	1.15	1.52	0	0	1	1	1	0	1	6	1
uLMS68	70	0.65	1.56	0	0	0	1	1	0	1	3	1
uLMS69	59	0.98	1.34	0	0	1	1	1	0	0	46	1
uLMS70	51	0.9	0.7	0	0	0	1	0	0	1	5	1
uLMS71	45	0.9	1.18	0	1	0	0	1	0		34	0
uLMS72	47	1.18	1.32	0	0	0	0	0	1	0	38	0
uLMS73	76	1.11	1.08	0	0	0	0	0	1	1	5	1
uLMS74	60	1.34	0.85	0	0	0	1	0	0	1	5	1
uLMS75	44	0.48	1.18	0	0	0	0	0	0	0	144	0
uLMS76	64	1.1	1.04	0	0	0	1	1	0	1	5	1
uLMS77	77	1.02	0.95	0	0	0	1	0	0	1	10	1
uLMS78	66	1.15	1.34	0	0	0	0	1	0	1	9	1
uLMS79	83	0.95	1.43	0	0	0	1	1	0	1	6	1
uLMS80	51	0.81	1.65	0	0	0	0	1	0	0	138	0
uLMS81	61		1.26	0	0	0	1			1	4	1
uLMS82	64	0.7	1.43	0	0	0	0	0	0	1	10	1
uLMS83	50	0.7	1.18	0	0	0	0	1	0	1	33	1
uLMS84	54	1	0.9	0	0	0	0	0	0		19	0
uLMS85	36	0.6	1	0	0	0	0	0	0	0	68	0
uLMS86	46	0.95	1.23	0	0	0	0	0	0	0	37	1
uLMS87	51	0.78		0	0	0	0			0	176	0
uLMS88	46	1	1.18	0	0	0	1		0	0	36	1
uLMS89	56	1.08	1.43	0	0	0	0	1	0		25	0
uLMS90	44	0.54	0.9	0	0	0	0	0		0	57	1
uLMS91	41	1.15	1.08	0	0	0	0	0	0	1	12	1
uLMS92	73	1.11	1.49	0	0	0	0	1	0	1	34	1
uLMS93	52	0.81	1.18	0	0	0	0	0		0	184	0
uLMS94	67	0.81	1.08	0	0	0	1	1	0	1	13	1
uLMS95	58	1.2		0	0	0	0	1		0	113	0
uLMS96	40	0.6		0	0	0	0			0	91	0
uLMS97	63			0	0	0	1			1	0	1
uLMS98	54	1.3		0	0	1	1			1	0	1
uLMS99	47	1.17		0	0	1	1			1	1	1
uLMS100	50	0.78		0	0	0	0			1	27	1
uLMS101	62	1.01		0	0	1	0	0		0	47	1
uLMS102	43	0.7		0	0	1	0			0	108	0
uLMS103	48	0.3		0	0	0	0			0	192	0
uLMS104	57	1	1.23	0	0	0	0		1	0	141	0
uLMS105	59	1.15		0	0	0	0			1	7	1
uLMS106	50	0.52		0	0	0	0			0	248	0
uLMS107	53	0.95		0	0	0	0			1	15	1
uLMS108	45	0.6		0	0	0	0			0	247	0
uLMS109	55	0.85		1	1	0	1	1		1	8	1
uLMS110	48	0.91		0	0	0	0			1	32	1
uLMS111	43	0.6		0	0	0	0			0	228	0
uLMS112	48	0.78		0	0	0	0			1	30	1
uLMS113	62	1	1.11	0	0	0	0		0	0	60	1
uLMS114	76	0.85	1	0	0	0	0		0	0	84	1
uLMS115	44			0	0	0	0	0		0	179	0
uLMS116	55	0.81				0				1	18	1
uLMS117	56	1	1.3	0	0	0	0	1	0	1	5	1
uLMS118	60	1.11	1.38	0	0	0	1	1	0	1	0	1
uLMS119	48	1.2	1.3	0	1	0	0	0	0	1	18	1
uLMS120	45	0.95	0.9	0	0	0	0	1	0	0	161	0
uLMS121	41	1.2	1	0	0	1	1	1	0	1	17	1
uLMS122	47	1.03	1.3	0	0	0	1	1	0	1	12	1
uLMS123	36	1.3		1	0	0	0			0	36	1
uLMS124	52	1		0	0	0	0			1	4	1
uLMS125	44	1.3	1.18	0	1	0	1	0	0	1	3	1
uLMS126	43	1.46	0.6	0	0	0	0		0		18	0
uLMS127	48	0.7	0.95	0	0	0	0		0	0	61	1
uLMS128	46	1.36	0.85	0	0	0	1		0	0	42	0
uLMS129	42	1	0.95	0	0	0	0	1	0	0	38	0
uLMS130	45	1.15		0	0	0	0			1	14	1
uLMS131	53	0.6	1.08	0	0	0	0	0	1	0	91	0
uLMS132	59	1	1.3	0	0	0	0	1	0	1	27	1
uLMS133	50	0.7	1	0	0	0	0	0	0	1	20	1
uLMS134	46	1		0	0	0	0	1		1	2	1
uLMS135	39	0.7		0	0	0	0			0	113	1
uLMS136	50	1.2	1.7	0	0	0	0	0	0	1	27	1
uLMS137	41	1	1.3	0	0	0	0	0	0	0	118	0
uLMS138	52	0.76	0.7	0	0	0	0	0	0	0	94	0
uLMS139	42	0.93	1.3	0	1	1	1	1	0	1	1	1
uLMS140	42	0.7		0	0	0	0			1	14	1
uLMS141	42	1.45	1.04	0	0	0	0	1	0	0	82	0
uLMS142	47	1.48	0	0	1	0	0		0	0	79	0
uLMS143	44	1.15	1.15	0	0	0	0			0	40	1
uLMS144	39	1.32		0	0	0	0			0	70	0
uLMS145	48	1.36	1.08	0	0	0	1		0	1	9	1
uLMS146	46	1.09	1.3	0	0	0	0			0	39	0
uLMS147	35	0.85	0.7	0	0	0	0	1	0		26	0
uLMS148	49	1.04		0	0	0	0			0	107	1
uLMS149	60			0	0	0	0			0	102	0
uLMS150	55	1.04	1.34	0	0	1	1	1	0		9	0
uLMS151	53	0.67	1.18	0	0	0	0	0	0	0	43	0
uLMS152	44	0.95		0	0	0	0				1	0
uLMS153	53	0.78	0.78	0	0	0	0	0	0	0	158	0
uLMS154	52	1	1	0	0	0	0	0	0	0	68	0
uLMS155	42			0	0	0	0			1	30	1
uLMS156	44	1.56	1.3	0	1	0	1		0	1	4	1
uLMS157	47	1.08	1.3	0	0	0	0		0	0	52	1
uLMS158	52	1.16		0	0	0	0			0	115	0
uLMS159	39	1.29	1.4	0	0	0	0	1	0		29	0
uLMS160	38	1.1	1.3	0	0	0	0	0	0	0	49	0
uLMS161	62	1	1.34	1	0	0	0		0		3	0
uLMS162	36	1.06	1.08	0	0	0	0		0	0	63	0
uLMS163	45	0.7	1.4	0	0	0	0	0	0	0	38	1
uLMS164	39	0.68	0.3	0	0	0	0		0	0	43	0
uLMS165	57	0.9		0	0	0	0	1		1	30	1
uLMS166	70	0.96	1.08	0	0	0	0		0	0	40	1
uLMS167	51	1.11		0	0	0	0			1	17	1
uLMS168	24	1.32	0.6	0	0	0	0	1	0	0	45	0
uLMS169	48	0.85	1.38	1	0	0	0	0	0	0	126	0
uLMS170	46	1.24	0.48	0	0	0	0	1	1		0	0
uLMS171	79	1.2	1.11	1	1	0	1	1	0	1	0	1
uLMS172	54	1.04	1.18	0	1	0	1	1	0	1	30	1
uLMS173	36	0.74	2	0	0	0	0	0	0	1	27	1
uLMS174	53	1	1.7	0	0	0	1	1	0	1	16	1
uLMS175	75	0.48	1	0	0	0	0			1	2	1
uLMS176	44	0.91		0	0	0	0	0		1	6	1
uLMS177	35	0.9		0	0	0	0	1		0	41	1
uLMS178	38	1.38		0	1	0	1			0	147	0
uLMS179	51	1.23	0.6	1	0	0	0	0	0	0	37	1
uLMS180	79	1.3		0	1	0	1			1	0	1
uLMS181	33	0.78		0	0	0	0				10	0
uLMS182	45	1.28	1	0	0	0	0	0	0	1	3	1
uLMS183	45	1.3	1.62	0	0	0	0	1	0	0	38	1
uLMS184	48	0.6	0.6	0	0	0	0	1	0	0	133	0
uLMS185	38	1.28	1.18	0	0	0	0	0	0	1	10	1
uLMS186	33	1.34	1.04	0	1	0	1	0	0	1	30	1
uLMS187	39									0	164	0
uLMS188	60	0.78	1.18	0	0	0	0	1	0	1	9	1
uLMS189	34	1.04	1.43	0	0	0	0	0	0		0	0
uLMS190	78	1	1.58	0	0	0	0	0	1		26	0
uLMS191	60	1.15	1.43	0	0	0	1	0	1	1	3	1
uLMS192	54	0.95	1.18	0	0	0	0	0	1	0	155	0
uLMS193	47	1.11	1.46	0	0	0	1	0		1	5	1
uLMS194	53	0.79	1.11	0	0	0	0	1	0	1	20	1
uLMS195	42	0.98	0.3	0	0	0	0	0	1	0	120	0
uLMS196	52	1.26	1.08	0	0	0	0	1	0	1	1	1
uLMS197	72	1.24	0.48	0	1	0	1	0	0	0	43	0
uLMS198	52	0.7	1.23	0	0	0	1	1	0		2	0
uLMS199	46	1.02	1.11	0	0	0	0	0	0	0	37	0
uLMS200	34	0.95	1.34	0	0	0	0	1	0	0	199	0
uLMS201	33	0.95	0.78	0	0	0	0	0	1	0	39	0

## Sheet: Annotation
Variable abbreviation	Variable name	Coding
Age	Age	NA
log_tum_dia	Tumor diameter (log transformed)	NA
log_MF	Mitotic Count (log transformed)	NA
Cervix	Cervical involvement	0 = No ; 1 = Yes
Parametrium	Parametrial involvement	0 = No ; 1 = Yes
LymphNode	Lymph node metastasis	0 = No ; 1 = Yes
Distant_exceptLN	Distant metastasis except lymph node metastasis	0 = No ; 1 = Yes
MF_VascularInvasion	Lymphovascular space invasion (microscopic finding)	0 = absent ; 1 = present
MF_Circumscription	Tumor circumscription (microscopic finding)	0 = infiltrative ; 1 = circumscribed
ThreeYearSurvival	3-year survival status	0 = alive; 1 = dead
OS	Overal survival (months)	NA
Dead	Survival status	0 = alive; 1 = dead
